# Supplementary material for: Aerobic Isolates from Gestational and Non-Gestational Lactating Bitches (Canis lupus familiaris)
Source: MDPI journal article supplement (doi:10.3390/ani11113259), 2021-11-14
Supplement: s1 [file s1]

**Table S1.** Detailed individual data of the dogs included in the study.

|    | <b>Breed</b>          | <b>Years</b> | <b>Months</b> | <b>Body weight</b> | <b>Lactation period</b> | <b>Diagnostic</b>    | <b>Reproduction status</b> |
|----|-----------------------|--------------|---------------|--------------------|-------------------------|----------------------|----------------------------|
| 1  | Rottweiler            | 3 years      | 36            | 45 kg              | PP                      | Mastitis acuta       | Primiparous                |
| 2  | Cocker Spaniel        | 10 years     | 120           | 15 kg              | LSG                     | Mastitis acuta       | Intact                     |
| 3  | Mongrel               | 5 years      | 60            | 30 kg              | PP                      | Mastitis acuta       | NDA                        |
|    | Caucasian Shepherd    |              |               |                    |                         |                      |                            |
| 4  | Dog                   | 4 years      | 48            | 55 kg              | PP                      | Mastitis acuta       | Multiparous                |
| 5  | Bichon                | 4 years      | 48            | 8 kg               | LSG                     | Mastitis acuta       | Primiparous                |
| 6  | Dobermann             | 1.4 years    | 16            | 35 kg              | PP                      | Healthy              | Primiparous                |
| 7  | Vizsla                | 3 years      | 36            | 23 kg              | PP                      | Mastitis acuta       | Primiparous                |
| 8  | Boxer                 | 6 years      | 72            | 26 kg              | PP                      | Mastitis acuta       | Multiparous                |
| 9  | Rottweiler            | 5 years      | 60            | 40 kg              | PP                      | Subclinical mastitis | Multiparous                |
| 10 | Mongrel               | 12 years     | 144           | 35 kg              | AP                      | Mastitis acuta       | Primiparous                |
|    | Caucasian Shepherd    |              |               |                    |                         |                      |                            |
| 11 | Dog                   | 4.5 years    | 53            | 65 kg              | PP                      | Subclinical mastitis | Multiparous                |
| 12 | Beagle                | 6 years      | 72            | 16 kg              | PP                      | Healthy              | Multiparous                |
| 13 | English Bulldog       | 3 years      | 36            | 25 kg              | PP                      | Subclinical mastitis | Multiparous                |
| 14 | Cane Corso            | 5 years      | 60            | 45 kg              | PP                      | Mastitis acuta       | Multiparous                |
| 15 | Basset Hound          | 2 years      | 24            | 30 kg              | PP                      | Subclinical mastitis | Primiparous                |
|    |                       |              |               |                    |                         | Mammary congestion   |                            |
| 16 | Yorkshire Terrier     | 2.5 years    | 29            | 5 kg               | PP                      |                      | Primiparous                |
| 17 | German Shepherd       | 7 years      | 84            | 30 kg              | PP                      | Subclinical mastitis | Multiparous                |
| 18 | German Shepherd       | 5 years      | 60            | 30 kg              | PP                      | Healthy              | Multiparous                |
| 19 | German Shepherd       | 6 years      | 72            | 30 kg              | PP                      | Healthy              | Multiparous                |
| 20 | English Bulldog       | 2 years      | 24            | 20 kg              | PP                      | Healthy              | Primiparous                |
| 21 | Siberian Husky        | 2.5 years    | 29            | 25 kg              | PP                      | Healthy              | Multiparous                |
| 22 | Shih Tzu              | 2 years      | 24            | 7 kg               | PP                      | Healthy              | Primiparous                |
| 23 | Pekingese             | 3 years      | 36            | 3 kg               | LSG                     | Healthy              | Intact                     |
| 24 | Mongrel               | 1.5 years    | 17            | 50 kg              | PP                      | Subclinical mastitis | Multiparous                |
| 25 | Rottweiler            | 3 years      | 36            | 40 kg              | PP                      | Healthy              | Multiparous                |
|    | Caucasian Shepherd    |              |               |                    |                         |                      |                            |
| 26 | Dog                   | 5 years      | 60            | 60 kg              | PP                      | Subclinical mastitis | Multiparous                |
| 27 | Saint Bernard         | 6 years      | 72            | 50 kg              | PP                      | Healthy              | Multiparous                |
| 28 | Rottweiler            | 1.3 years    | 15            | 25 kg              | PP                      | Galactostasis        | Primiparous                |
| 29 | Cane Corso            | 3 years      | 36            | 45 kg              | PP                      | Healthy              | Primiparous                |
| 30 | Dobermann             | 3 years      | 36            | 35 kg              | PP                      | Galactostasis        | Primiparous                |
| 31 | Bichon                | 5 years      | 60            | 7 kg               | PP                      | Subclinical mastitis | Multiparous                |
|    | American              |              |               |                    |                         |                      |                            |
| 32 | Staffordshire Terrier | 1.5 years    | 17            | 23 kg              | PP                      | Healthy              | Primiparous                |
| 33 | Rottweiler            | 1.5 years    | 17            | 40 kg              | LSG                     | Galactostasis        | Intact                     |
| 34 | German Shepherd       | 3 years      | 36            | 30 kg              | PP                      | Healthy              | Multiparous                |
| 35 | German Shepherd       | 3 years      | 36            | 30 kg              | PP                      | Healthy              | Multiparous                |
| 36 | Labrador retriever    | 4 years      | 48            | 30 kg              | PP                      | Galactostasis        | Multiparous                |
|    | Caucasian Shepherd    |              |               |                    |                         |                      |                            |
| 37 | Dog                   | 1.8 years    | 20            | 51 kg              | PP                      | Subclinical mastitis | Primiparous                |
| 38 | Neapolitan Mastiff    | 3 years      | 36            | 51 kg              | LSG                     | Galactostasis        | Intact                     |
| 39 | Cane Corso            | 4 years      | 48            | 40 kg              | PP                      | Subclinical mastitis | Multiparous                |
| 40 | Yorkshire Terrier     | 1.2 years    | 14            | 5 kg               | PP                      | Healthy              | Primiparous                |
| 41 | Cane Corso            | 3 years      | 36            | 50 kg              | PP                      | Subclinical mastitis | Multiparous                |
| 42 | Pekingese             | 2.3 years    | 27            | 3 kg               | PP                      | Healthy              | Primiparous                |
| 43 | French Bulldog        | 3 years      | 36            | 12 kg              | LSG                     | Galactostasis        | Intact                     |
| 44 | Cane Corso            | 3 years      | 36            | 40 kg              | PP                      | Healthy              | Multiparous                |
| 45 | German Shepherd       | 3 years      | 36            | 30 kg              | PP                      | Healthy              | Primiparous                |
| 46 | Dobermann             | 5 years      | 60            | 40 kg              | LSG                     | Subclinical mastitis | NDA                        |
| 47 | American Bulldog      | 3.5 years    | 41            | 40 kg              | PP                      | Healthy              | Multiparous                |
| 48 | Bichon                | 14 years     | 168           | 8 kg               | LSG                     | Galactostasis        | Multiparous                |
| 49 | Rottweiler            | 2.5 years    | 29            | 40 kg              | PP                      | Healthy              | Primiparous                |
|    | Central Asian         |              |               |                    |                         |                      |                            |
| 50 | Shepherd Dog          | 7 years      | 84            | 50 kg              | PP                      | Subclinical mastitis | Multiparous                |
| 51 | Mongrel               | 3 years      | 36            | 10 kg              | LSG                     | Galactostasis        | Intact                     |
| 52 | Saint Bernard         | 3 years      | 36            | 40 kg              | PP                      | Healthy              | Primiparous                |
| 53 | Rottweiler            | 5.4 years    | 64            | 56 kg              | LSG                     | Galactostasis        | Multiparous                |
| 54 | Beagle                | 3 years      | 36            | 16 kg              | PP                      | Healthy              | Multiparous                |
| 55 | Mongrel               | 2 years      | 24            | 3 kg               | PP                      | Healthy              | Primiparous                |
| 56 | German Shepherd       | 3 years      | 36            | 25 kg              | PP                      | Healthy              | Multiparous                |
| 57 | German Shepherd       | 3.5 years    | 41            | 27 kg              | PP                      | Healthy              | Multiparous                |
| 58 | German Shepherd       | 3 years      | 36            | 30 kg              | PP                      | Healthy              | Multiparous                |
| 59 | German Shepherd       | 3 years      | 36            | 30 kg              | PP                      | Healthy              | Multiparous                |
| 60 | German Shepherd       | 7 years      | 84            | 35 kg              | PP                      | Healthy              | Multiparous                |
| 61 | Yorkshire Terrier     | 1.3 years    | 15            | 5 kg               | PP                      | Mastitis gangrenosa  | Primiparous                |

|    |                               |           |    |       |     |                       |             |
|----|-------------------------------|-----------|----|-------|-----|-----------------------|-------------|
| 62 | Caucasian Shepherd<br>Dog     | 5 years   | 60 | 50 kg | AP  | Healthy               | Multiparous |
| 63 | Yorkshire Terrier             | 3 years   | 36 | 3 kg  | PP  | Healthy               | Multiparous |
| 64 | American Bulldog              | 1.3 years | 15 | 35 kg | LSG | Galactostasis         | Intact      |
| 65 | German Shepherd               | 1.5 years | 17 | 20 kg | PP  | Mammary<br>congestion | Primiparous |
| 66 | German Shepherd               | 6 years   | 72 | 25 kg | PP  | Mammary<br>congestion | Multiparous |
| 67 | German Shepherd               | 2.5 years | 29 | 20 kg | PP  | Healthy               | Multiparous |
| 68 | Belgian Shepherd              | 5.5 years | 65 | 20 kg | PP  | Healthy               | Multiparous |
| 69 | Mongrel                       | 4 years   | 48 | 20 kg | PP  | Mastitis acuta        | Multiparous |
| 70 | Caucasian Shepherd<br>Dog     | 3 years   | 36 | 60 kg | AP  | Healthy               | Multiparous |
| 71 | Cane Corso                    | 3 years   | 36 | 45 kg | PP  | Healthy               | Primiparous |
| 72 | German Shepherd               | 5 years   | 60 | 25 kg | PP  | Subclinical mastitis  | Multiparous |
| 73 | German Shepherd               | 1.5 years | 17 | 25 kg | PP  | Healthy               | Primiparous |
| 74 | German Shepherd               | 1.5 years | 17 | 25 kg | PP  | Healthy               | Primiparous |
| 75 | German Shorthaired<br>Pointer | 6 years   | 72 | 31 kg | PP  | Healthy               | Primiparous |
| 76 | Siberian Husky                | 3 years   | 36 | 25 kg | PP  | Healthy               | Multiparous |
| 77 | Cane Corso                    | 4 years   | 48 | 35 kg | PP  | Mastitis acuta        | Multiparous |
| 78 | Bucovina Shepherd<br>Dog      | 3.3 years | 39 | 44 kg | LSG | Galactostasis         | NDA         |
| 79 | German Shepherd               | 5 years   | 60 | 30 kg | PP  | Healthy               | Multiparous |
| 80 | Cane Corso                    | 3 years   | 36 | 45 kg | PP  | Subclinical mastitis  | Multiparous |
| 81 | Cane Corso                    | 3 years   | 36 | 40 kg | PP  | Subclinical mastitis  | Primiparous |
| 82 | Siberian Husky                | 4 years   | 48 | 12 kg | LSG | Galactostasis         | Intact      |
| 83 | French Bulldog                | 3 years   | 36 | 13 kg | PP  | Healthy               | Primiparous |
| 84 | Golden Retriever              | 4 years   | 48 | 25 kg | PP  | Healthy               | Primiparous |
| 85 | Dachshund                     | 1 year    | 12 | 8 kg  | LSG | Galactostasis         | Intact      |
| 86 | Dobermann                     | 1.8 years | 20 | 40 kg | PP  | Mastitis acuta        | Primiparous |
| 87 | German Shorthaired<br>Pointer | 5 years   | 60 | 20 kg | PP  | Subclinical mastitis  | Primiparous |

Abbreviations: LSG—*Lactatio sine graviditate*; AP—*Ante-partum*; PP—*Post-partum*; NDA—No data available.
