# Supplementary material for: Aerobic Isolates from Gestational and Non-Gestational Lactating Bitches (Canis lupus familiaris)
Source: MDPI journal article supplement (doi:10.3390/ani11113259), 2021-11-14
Supplement: s1 [file s1]

**Table S2.** Anamnestic data related to the dogs included in the study.

|                              |                                      | Healthy<br>N=41 | Subclinical mastitis<br>N=17 | Clinical mastitis<br>N=29 |
|------------------------------|--------------------------------------|-----------------|------------------------------|---------------------------|
| Age                          |                                      | 1.2-7 years     | 1.5-7 years                  | 1-14 years                |
| Bodyweight                   |                                      | 3-60 kg         | 7-65 kg                      | 5-56 kg                   |
| Season                       | Spring                               | 14(34.1%)       | 1 (5.9%)                     | 12 (41.4%)                |
|                              | Summer                               | 9 (22.0%)       | 5 (29.4%)                    | 7 (24.1%)                 |
|                              | Autumn                               | 10 (24.4%)      | 7 (41.2%)                    | 5 (17.2%)                 |
|                              | Winter                               | 8 (19.5%)       | 4 (23.5%)                    | 5 (17.2%)                 |
| Type of shelter              | Backyard                             | 10 (24.4%)      | 9 (52.9%)                    | 11 (37.9%)                |
|                              | Flat                                 | 5 (12.2%)       | 1 (5.9%)                     | 5 (17.2%)                 |
|                              | House and backyard                   | 1 (2.4%)        | -                            | 2 (6.9%)                  |
|                              | House                                | 6 (14.06%)      | -                            | 6 (20.7%)                 |
|                              | Kennel                               | 19 (46.3%)      | 7 (41.2%)                    | 4 (13.8%)                 |
|                              | Street                               |                 |                              | 1(3.4%)                   |
|                              | Commercial                           | 17 (41.5%)      | 6 (35.3%)                    | 11 (37.9%)                |
|                              | Commercial/Cooked                    | 16 (39.0%)      | 7 (41.2%)                    | 8 (27.6%)                 |
| Type of food                 | Cooked                               | 4 (9.8%)        | 1 (5.9%)                     | 5 (17.2%)                 |
|                              | NDA                                  | 4 (9.8%)        | 3 (17.6%)                    | 5 (17.2%)                 |
|                              | LSG                                  | 1 (2.4%)        | 1 (5.9%)                     | 5 (17.2%)                 |
|                              | Obstetrical                          | 4 (9.8%)        | 4 (23.5%)                    | 3 (10.3%)                 |
| History                      | Other pathology                      | 1 (2.4%)        | 1 (5.9%)                     |                           |
|                              | NDA                                  | 35 (85.4%)      | 11 (64.7%)                   | 21 (72.4%)                |
|                              | AI                                   | 7 (17.1%)       | 4 (23.5%)                    | 1 (3.4%)                  |
|                              | Natural controlled                   | 29 (70.7%)      | 11 (64.7%)                   | 9 (31.0%)                 |
| Type of coitus               | Natural uncontrolled                 | 2 (4.9%)        | 1(5.9%)                      | 6 (20.7%)                 |
|                              | NDA                                  | 3 (7.5%)        | 1 (5.9%)                     | 13 (44.8%)                |
|                              | Intact                               | 1 (2.4%)        | -                            | 8 (27.6%)                 |
|                              | Primiparous                          | 17 (41.5%)      | 4 (23.5%)                    | 10 (34.5%)                |
| Reproduction status          | Multiparous                          | 23 (56.1%)      | 12 (70.6%)                   | 9 (31.0%)                 |
|                              | NDA                                  | -               | 1 (5.9%)                     | 2 (6.9%)                  |
|                              | LSG                                  | 1 (2.4%)        | 1 (5.9%)                     | 12 (41.4%)                |
|                              | AP                                   | 2 (4.9%)        | -                            | 1 (3.4%)                  |
| Lactation period             | PP                                   | 38 (92.7%)      | 16 (94.1%)                   | 16 (55.2%)                |
|                              | 1 <sup>st</sup>                      | 21 (51.2%)      | 12 (70.6%)                   | 8 (27.6%)                 |
|                              | 2 <sup>nd</sup>                      | 9 (22.0%)       | 2 (11.8%)                    | 3 (10.3%)                 |
|                              | 3 <sup>rd</sup>                      | 5 (12.2%)       | 1 (5.9%)                     | 2 (6.9%)                  |
| Lactation age in weeks       | 4 <sup>th</sup>                      | -               | -                            | -                         |
|                              | 5 <sup>th</sup>                      | 2 (4.9%)        | -                            | -                         |
|                              | 7 <sup>th</sup>                      | 1 (2.4%)        | -                            | 1 (3.4%)                  |
|                              | 8 <sup>th</sup>                      | 1 (2.4%)        | 1 (5.9%)                     | -                         |
|                              | NDA                                  | 2 (4.9%)        | 1 (5.9%)                     | 15 (51.7%)                |
| Gestation duration           |                                      | 51-67 days      | 54-64 days                   | 56-67 days                |
| Mammary gland clinical signs | Hard without modified milk secretion | -               | -                            | 7 (24.1%)                 |
|                              | Hard with modified milk secretion    | -               | -                            | 2 (6.9%)                  |
|                              | Hard and sensitive                   | -               | -                            | 5 (17.2%)                 |

|                       |                         |                                |                                                                                                        |                                                                                                                                       |
|-----------------------|-------------------------|--------------------------------|--------------------------------------------------------------------------------------------------------|---------------------------------------------------------------------------------------------------------------------------------------|
|                       | Modified milk secretion | -                              | -                                                                                                      | 5 (17.2%)                                                                                                                             |
|                       | No overt signs          | 41 (100.0%)                    | 17 (100.0%)                                                                                            | 10 (34.5%)                                                                                                                            |
| Concurrent affections | Mortinatality           | 14 (34.1%)                     | 10 (58.8%)                                                                                             | 4 (13.8%)                                                                                                                             |
|                       | Small litter            | 3 (7.3%)                       | -                                                                                                      | 2 (6.9%)                                                                                                                              |
|                       | Obstetrical             | 3 (7.3%)                       | 4 (23.5%)                                                                                              | 7 (24.1%)                                                                                                                             |
|                       | Other pathology         | 1 (2.4%)                       | -                                                                                                      | 5 (17.2%)                                                                                                                             |
|                       | NDA                     | 20 (48.8%)                     | 3 (17.6%)                                                                                              | 11 (37.9%)                                                                                                                            |
| Laboratory assays     |                         |                                |                                                                                                        |                                                                                                                                       |
| Milk pH               | Acidic (6.0-6.5)        | 25 (61.0%)                     | 2 (11.8%)                                                                                              | 3 (10.3%)                                                                                                                             |
|                       | Alkaline (7.0-9.5)      | 14 (34.1%)                     | 14 (82.4%)                                                                                             | 23 (79.3%)                                                                                                                            |
|                       | NDA                     | 2 (4.9%)                       | 1 (5.9%)                                                                                               | 3 (10.3%)                                                                                                                             |
| CRP                   | Milk                    | 0.1–2.5 µg/mL                  | 2.9–20.7 µg/mL                                                                                         | 2.8–9.2 µg/mL                                                                                                                         |
|                       | Serum                   | 3.9–8.0 µg/mL                  | 8.1–67.9 µg/mL                                                                                         | 5.2–81.7 µg/mL                                                                                                                        |
| Milk cytology         |                         | Few somatic and squamous cells | Moderate somatic cells, degenerated neutrophils, foamy and epithelial cells, bacteria and phagocytosis | Increased somatic cells, degenerated neutrophils, eosinophils, foamy cells, cellular debris, erythrocytes, bacteria, and phagocytosis |

Abbreviations: LSG=*Lactatio sine graviditate*; AP=*Ante-partum*; PP=*Post-partum*; AI=Artificial insemination; NDA=No data available; CRP=C-reactive protein; N=number of observations.
