# Supplementary material for: Aerobic Isolates from Gestational and Non-Gestational Lactating Bitches (Canis lupus familiaris)
Source: MDPI journal article supplement (doi:10.3390/ani11113259), 2021-11-14
Supplement: s1 [file s1]

**Table S3.** Detailed individual data, with the microbiological diagnostic, of the dogs removed from the study.

|    | Breed                          | Years     | Months | Body weight | Lactation period | Microbiological Diagnostic                                 | Reproduction status |
|----|--------------------------------|-----------|--------|-------------|------------------|------------------------------------------------------------|---------------------|
| 1  | Miniature Schnauzer            | 6 years   | 72     | 8 kg        | PP               | <i>P. mirabilis</i>                                        | Multiparous         |
| 2  | Cocker Spaniel                 | 4 years   | 48     | 25 kg       | PP               | <i>S. sciuri</i>                                           | Multiparous         |
| 3  | Mongrel                        | 3 years   | 36     | 30 kg       | PP               | <i>E. vilorum/K. rosea</i>                                 | NDA                 |
| 4  | Siberian Husky                 | 1.5 years | 17     | 20 kg       | PP               | <i>Staphylococcus</i> sp.                                  | Multiparous         |
| 5  | Siberian Husky                 | 1.8 years | 20     | 25 kg       | PP               | <i>Staphylococcus</i> sp.                                  | Primiparous         |
| 6  | American Staffordshire Terrier | 1 year    | 12     | 22 kg       | LSG              | Sterile                                                    | NDA                 |
| 7  | German Shepherd                | 4.5 years | 53     | 25 kg       | PP               | <i>A. radiobacter/A. hydrophila</i>                        | Multiparous         |
| 8  | German Shepherd                | 3.5 years | 41     | 25 kg       | PP               | <i>S. lentus/S. putrefaciens</i>                           | Multiparous         |
| 9  | Miniature Schnauzer            | 7 years   | 84     | 10 kg       | PP               | <i>Staphylococcus</i> sp.                                  | Multiparous         |
| 10 | Bucovina Shepherd Dog          | 11 years  | 132    | 40 kg       | LSG              | <i>S. aureus</i>                                           | NDA                 |
| 11 | Mongrel                        | 5 years   | 60     | 10 kg       | PP               | <i>L. mesenteroides</i> ssp <i>cremoris/S. epidermidis</i> | Multiparous         |
| 12 | German Shepherd                | 3.5 years | 41     | 20 kg       | PP               | <i>B. cereus</i>                                           | Multiparous         |
| 13 | Bichon                         | 10 months | 10     | 5 kg        | LSG              | <i>B. lentus</i>                                           | Intact              |

Abbreviations:PP: post-partum; LSG: *Lactatio sine graviditate*; AP: ante-partum; NDA—No data available.
